# Supplementary material for: Exploring Physiological Knowledge through Models: A Pathway to Innovation in Medical Education
Source: Research Square preprint supplement (doi:10.21203/rs.3.rs-6027445/v1), 2025-04-16
Supplement: Supplementary file 1 [file 04bca17996b9183dad2de80e.pdf]

## **Survey on the Impact of Creating Physiological Models on Learning in Physiology Courses**

Dear students, we are conducting a survey on the impact of creating physiological models on learning physiology courses. Your feedback will help us better understand the effectiveness of this teaching method and identify potential areas for improvement. The data collected will be used for scientific research and may be published in academic articles. Participation in this survey is voluntary, and you may withdraw at any time. This questionnaire will take approximately 5-10 minutes to complete, and your personal information and responses will be kept strictly confidential. The data will only be used for academic research and will never be used for commercial purposes. All responses will be processed anonymously to ensure the privacy of your identity. Participating in this research will not pose any direct risks to you. You will have the opportunity to share your views and contribute valuable insights and information to relevant academic research. If you agree, please complete the questionnaire below.

1. Do you think creating models is helpful for learning in physiology courses?
  - A. It helps a lot
  - B. It helps much
  - C. It helps a little
  - D. It helps minimally
  - E. No, it doesn't
  
2. In what specific aspects do you think creating models contributes to the learning of physiology courses?
  - A. Help understand complex concepts and processes
  - B. Improve memory and consolidate knowledge
  - C. Gain a deeper understanding and exploration of physiological knowledge
  - D. Enhance learning interest and motivation
  - E. Improve self-learning abilities
  - F. Others
  
3. Do you think that model making has increased your interest in physiology?
  - A. It helps a lot
  - B. It helps much
  - C. It helps a little
  - D. It helps minimally
  - E. No, it doesn't

4. What frequency do you believe model making should be used in physiology course learning?
  - A. Very high, should be widely applied
  - B. High, can be used moderately
  - C. Average, use as needed
  - D. Low, only used in specific circumstances
  - E. Should not be used, may have negative effects
  
5. Do you think that model making can enhance your participation in physiology courses?
  - A. I strongly agree
  - B. I agree
  - C. Neutral
  - D. I disagree
  - E. I strongly disagree
  
6. Do you believe that by creating physiological models, you can improve your imagination and innovative design skills?
  - A. I strongly agree
  - B. I agree
  - C. Neutral
  - D. I disagree
  - E. I strongly disagree
  
7. Do you think that creating physiological models can enhance your critical thinking and problem-solving abilities?
  - A. I strongly agree
  - B. I agree
  - C. Neutral
  - D. I disagree
  - E. I strongly disagree
  
8. In your opinion, should teachers introduce model making in physiology courses?
  - A. I strongly agree
  - B. I agree

- C. Neutral
- D. I disagree
- E. I strongly disagree

9. If given the opportunity, would you participate again in a physiology course that incorporates model making as a learning aid?

- A. Definitely will participate
- B. Probably will participate
- C. Unsure about participation
- D. Probably will not participate
- E. Definitely will not participate
